# Supplementary material
Source: Research Square preprint supplement (doi:10.21203/rs.3.rs-9577321/v1)
Supplement: Supplementary file 1 [file 66af30597665bc4ac97e1efa.docx]

Table 4.

| sample | FG2 |  |  |  |  |  |  |  |  |  |  | FG3 |  |  |  |  |
| --- | --- | --- | --- | --- | --- | --- | --- | --- | --- | --- | --- | --- | --- | --- | --- | --- |
| nb | 1 | 2 | 3 | 4 | 5 | 6 | 7 | 8 | 9 | 10 | 11 | 12 | 13 | 14 | 15 | 16 |
| SiO2 (wt. %) | 52.19 | 51.93 | 52.29 | 52.25 | 52.56 | 52.58 | 52.33 | 51.82 | 52.27 | 51.79 | 52.49 | 52.22 | 51.86 | 52.26 | 51.98 | 51.95 |
| TiO2 | 0.45 | 0.43 | 0.39 | 0.41 | 0.34 | 0.35 | 0.37 | 0.44 | 0.46 | 0.40 | 0.43 | 0.64 | 0.67 | 0.65 | 0.68 | 0.72 |
| Al2O3 | 7.50 | 7.70 | 7.55 | 7.42 | 7.58 | 7.36 | 7.76 | 7.33 | 7.61 | 7.43 | 7.47 | 7.86 | 7.95 | 7.84 | 8.34 | 8.00 |
| Cr2O3 | 0.66 | 0.76 | 0.67 | 0.68 | 0.64 | 0.80 | 0.50 | 0.63 | 0.65 | 0.63 | 0.69 | 0.65 | 0.61 | 0.70 | 0.70 | 0.65 |
| FeOt | 4.14 | 3.88 | 4.11 | 4.25 | 4.07 | 4.07 | 3.92 | 4.27 | 3.97 | 4.13 | 3.95 | 4.17 | 4.35 | 4.55 | 4.53 | 4.40 |
| MnO | 0.14 | 0.04 | 0.10 | 0.08 | 0.03 | 0.10 | 0.07 | 0.05 | 0.15 | 0.17 | 0.05 | 0.10 | 0.04 | 0.09 | 0.09 | 0.04 |
| MgO | 16.41 | 16.17 | 16.28 | 16.03 | 16.19 | 15.98 | 15.77 | 16.09 | 16.20 | 15.81 | 15.95 | 15.94 | 15.61 | 15.51 | 15.21 | 15.51 |
| CaO | 18.52 | 18.67 | 18.61 | 18.73 | 18.56 | 18.57 | 18.47 | 18.58 | 18.55 | 18.65 | 18.72 | 18.57 | 18.43 | 18.46 | 18.00 | 18.47 |
| Na2O | 1.80 | 1.83 | 1.79 | 1.66 | 1.76 | 1.72 | 1.86 | 1.80 | 1.78 | 1.61 | 1.82 | 1.66 | 1.55 | 1.50 | 1.74 | 1.53 |
| sum | 101.91 | 101.40 | 101.92 | 101.57 | 101.87 | 101.69 | 101.09 | 101.11 | 101.66 | 100.63 | 101.59 | 101.87 | 101.14 | 101.67 | 101.31 | 101.28 |
|  |  |  |  |  |  |  |  |  |  |  |  |  |  |  |  |  |
| Si (apfu) | 0.868 | 0.864 | 0.870 | 0.870 | 0.875 | 0.875 | 0.871 | 0.862 | 0.870 | 0.862 | 0.874 | 0.869 | 0.863 | 0.870 | 0.865 | 0.865 |
| Ti | 0.006 | 0.005 | 0.005 | 0.005 | 0.004 | 0.004 | 0.005 | 0.006 | 0.006 | 0.005 | 0.005 | 0.008 | 0.008 | 0.008 | 0.009 | 0.009 |
| Al | 0.147 | 0.151 | 0.148 | 0.146 | 0.149 | 0.144 | 0.152 | 0.144 | 0.149 | 0.146 | 0.146 | 0.154 | 0.156 | 0.154 | 0.164 | 0.157 |
| Cr | 0.009 | 0.010 | 0.009 | 0.009 | 0.008 | 0.011 | 0.007 | 0.008 | 0.009 | 0.008 | 0.009 | 0.009 | 0.008 | 0.009 | 0.009 | 0.009 |
| Fet | 0.058 | 0.054 | 0.057 | 0.059 | 0.057 | 0.057 | 0.055 | 0.059 | 0.055 | 0.057 | 0.055 | 0.058 | 0.061 | 0.063 | 0.063 | 0.061 |
| Mn | 0.002 | 0.001 | 0.001 | 0.001 | 0.000 | 0.001 | 0.001 | 0.001 | 0.002 | 0.002 | 0.001 | 0.001 | 0.001 | 0.001 | 0.001 | 0.001 |
| Mg | 0.407 | 0.401 | 0.404 | 0.398 | 0.401 | 0.396 | 0.391 | 0.399 | 0.402 | 0.392 | 0.396 | 0.395 | 0.387 | 0.385 | 0.377 | 0.385 |
| Ca | 0.330 | 0.333 | 0.332 | 0.334 | 0.331 | 0.331 | 0.329 | 0.331 | 0.331 | 0.333 | 0.334 | 0.331 | 0.329 | 0.329 | 0.321 | 0.329 |
| Na | 0.058 | 0.059 | 0.058 | 0.053 | 0.057 | 0.055 | 0.060 | 0.058 | 0.058 | 0.052 | 0.059 | 0.054 | 0.050 | 0.049 | 0.056 | 0.050 |
|  |  |  |  |  |  |  |  |  |  |  |  |  |  |  |  |  |
| Mg/Mg+Fet | 87.59 | 88.13 | 87.58 | 87.06 | 87.64 | 87.48 | 87.75 | 87.03 | 87.92 | 87.22 | 87.79 | 87.20 | 86.47 | 85.86 | 85.67 | 86.27 |
| En | 51.07 | 50.86 | 50.83 | 50.21 | 50.85 | 50.45 | 50.39 | 50.48 | 50.86 | 49.98 | 50.38 | 50.30 | 49.84 | 49.40 | 49.47 | 49.58 |
| Fs | 7.48 | 6.92 | 7.39 | 7.61 | 7.22 | 7.40 | 7.16 | 7.61 | 7.26 | 7.63 | 7.10 | 7.56 | 7.86 | 8.30 | 8.44 | 7.96 |
| Wo | 41.45 | 42.22 | 41.78 | 42.18 | 41.93 | 42.15 | 42.45 | 41.91 | 41.88 | 42.39 | 42.52 | 42.14 | 42.30 | 42.29 | 42.10 | 42.45 |
