# Supplementary material
Source: Research Square preprint supplement (doi:10.21203/rs.3.rs-9577321/v1)
Supplement: Supplementary file 2 [file 94ed2b1a68af88e7264affda.docx]

Table 2.

| sample | FG2 |  |  |  |  | |  |  |  | |  | |  | |  |  | FG3 |  |  |  |  |  |  |
| --- | --- | --- | --- | --- | --- | --- | --- | --- | --- | --- | --- | --- | --- | --- | --- | --- | --- | --- | --- | --- | --- | --- | --- |
| nb | 1 | 2 | 3 | 4 | | 5 | 6 | 7 | 8 | 9 | | 10 | | 11 | | 12 | 13 | 14 |
| SiO2 (wt. %) | 40.97 | 40.95 | 40.90 | 41.09 | | 41.12 | 41.21 | 41.35 | 40.72 | 41.41 | | 41.72 | | 41.54 | | 41.40 | 41.48 | 40.91 |
| FeO | 10.43 | 10.54 | 11.28 | 11.30 | | 11.27 | 11.20 | 11.00 | 10.62 | 11.15 | | 10.79 | | 10.73 | | 10.50 | 11.19 | 10.63 |
| MnO | 0.18 | 0.12 | 0.17 | 0.22 | | 0.14 | 0.10 | 0.06 | 0.17 | 0.09 | | 0.16 | | 0.25 | | 0.15 | 0.16 | 0.14 |
| MgO | 47.23 | 48.14 | 47.73 | 47.91 | | 47.92 | 48.03 | 47.74 | 47.60 | 47.69 | | 47.45 | | 47.78 | | 48.04 | 47.15 | 48.35 |
| CaO | 0.14 | 0.09 | 0.10 | 0.08 | | 0.09 | 0.12 | 0.14 | 0.11 | 0.10 | | 0.10 | | 0.14 | | 0.15 | 0.12 | 0.11 |
| NiO | 0.42 | 0.44 | 0.37 | 0.36 | | 0.46 | 0.25 | 0.46 | 0.27 | 0.22 | | 0.55 | | 0.40 | | 0.25 | 0.55 | 0.41 |
| sum | 99.39 | 100.28 | 100.54 | 100.97 | | 100.99 | 100.90 | 100.76 | 99.49 | 100.64 | | 100.77 | | 100.84 | | 100.49 | 100.65 | 100.54 |
|  |  |  |  |  | |  |  |  |  |  | |  | |  | |  |  |  |
| Si (apfu) | 1.018 | 1.006 | 1.005 | 1.006 | | 1.006 | 1.008 | 1.015 | 1.009 | 1.017 | | 1.025 | | 1.018 | | 1.016 | 1.021 | 1.002 |
| Fe2+ | 0.217 | 0.217 | 0.232 | 0.231 | | 0.231 | 0.229 | 0.226 | 0.220 | 0.229 | | 0.222 | | 0.220 | | 0.215 | 0.230 | 0.218 |
| Mn | 0.004 | 0.003 | 0.003 | 0.004 | | 0.003 | 0.002 | 0.001 | 0.004 | 0.002 | | 0.003 | | 0.005 | | 0.003 | 0.003 | 0.003 |
| Mg | 1.749 | 1.763 | 1.748 | 1.749 | | 1.747 | 1.752 | 1.746 | 1.758 | 1.746 | | 1.737 | | 1.745 | | 1.756 | 1.730 | 1.766 |
| Ca | 0.004 | 0.002 | 0.003 | 0.002 | | 0.002 | 0.003 | 0.004 | 0.003 | 0.003 | | 0.003 | | 0.004 | | 0.004 | 0.003 | 0.003 |
| Ni | 0.008 | 0.009 | 0.007 | 0.007 | | 0.009 | 0.005 | 0.009 | 0.005 | 0.004 | | 0.011 | | 0.008 | | 0.005 | 0.011 | 0.008 |
|  |  |  |  |  | |  |  |  |  |  | |  | |  | |  |  |  |
| Fo | 88.97 | 89.06 | 88.29 | 88.31 | | 88.34 | 88.43 | 88.55 | 88.87 | 88.40 | | 88.69 | | 88.80 | | 89.07 | 88.25 | 89.02 |

¨

Table 2 (end)

| sample | FG3 |  |  | |  | |  | |  | |  |  | |  | |  | |  | |
| --- | --- | --- | --- | --- | --- | --- | --- | --- | --- | --- | --- | --- | --- | --- | --- | --- | --- | --- | --- |
| nb | 15 | 16 | 17 | 18 | | 19 | | 20 | | 21 | | | 22 | | 23 | | 24 | | 25 | |
| SiO2 (wt. %) | 41.12 | 41.54 | 41.70 | 41.93 | | 41.84 | | 41.65 | | 41.35 | | | 41.36 | | 41.06 | | 40.87 | | 41.59 | |
| FeO | 10.80 | 10.87 | 10.74 | 11.16 | | 11.13 | | 11.65 | | 11.34 | | | 11.52 | | 11.37 | | 10.69 | | 11.53 | |
| MnO | 0.13 | 0.13 | 0.12 | 0.03 | | 0.18 | | 0.14 | | 0.18 | | | 0.14 | | 0.13 | | 0.16 | | 0.15 | |
| MgO | 47.58 | 47.08 | 46.72 | 46.68 | | 46.43 | | 46.18 | | 46.70 | | | 46.86 | | 46.68 | | 46.83 | | 46.36 | |
| CaO | 0.15 | 0.10 | 0.11 | 0.07 | | 0.10 | | 0.15 | | 0.35 | | | 0.18 | | 0.15 | | 0.47 | | 0.13 | |
| NiO | 0.31 | 0.34 | 0.24 | 0.37 | | 0.26 | | 0.26 | | 0.31 | | | 0.26 | | 0.24 | | 0.33 | | 0.25 | |
| sum | 100.09 | 100.06 | 99.63 | 100.25 | | 99.94 | | 100.03 | | 100.24 | | | 100.33 | | 99.63 | | 99.35 | | 100.01 | |
|  |  |  |  |  | |  | |  | |  | | |  | |  | |  | |  | |
| Si (apfu) | 1.014 | 1.027 | 1.036 | 1.037 | | 1.039 | | 1.035 | | 1.023 | | | 1.022 | | 1.021 | | 1.017 | | 1.033 | |
| Fe2+ | 0.223 | 0.225 | 0.223 | 0.231 | | 0.231 | | 0.242 | | 0.235 | | | 0.238 | | 0.236 | | 0.223 | | 0.240 | |
| Mn | 0.003 | 0.003 | 0.003 | 0.001 | | 0.004 | | 0.003 | | 0.004 | | | 0.003 | | 0.003 | | 0.003 | | 0.003 | |
| Mg | 1.749 | 1.735 | 1.730 | 1.721 | | 1.719 | | 1.710 | | 1.723 | | | 1.726 | | 1.730 | | 1.737 | | 1.716 | |
| Ca | 0.004 | 0.003 | 0.003 | 0.002 | | 0.003 | | 0.004 | | 0.009 | | | 0.005 | | 0.004 | | 0.012 | | 0.003 | |
| Ni | 0.006 | 0.007 | 0.005 | 0.007 | | 0.005 | | 0.005 | | 0.006 | | | 0.005 | | 0.005 | | 0.007 | | 0.005 | |
|  |  |  |  |  | |  | |  | |  | | |  | |  | |  | |  | |
| Fo | 88.70 | 88.53 | 88.57 | 88.17 | | 88.14 | | 87.60 | | 88.01 | | | 87.88 | | 87.98 | | 88.64 | | 87.75 | |
