# Supplementary material
Source: Research Square preprint supplement (doi:10.21203/rs.3.rs-9577321/v1)
Supplement: Supplementary file 3 [file 9857446337dfe8314f0dec1a.docx]

Table 3.

| sample | FG2 |  |  |  |  |  |  | FG3 |  |  |  |  |  |
| --- | --- | --- | --- | --- | --- | --- | --- | --- | --- | --- | --- | --- | --- |
| nb | 1 | 2 | 3 | 4 | 5 | 6 | 7 | 8 | 9 | 10 | 11 | 12 | 13 |
| SiO2 (wt. %) | 55.55 | 55.69 | 55.29 | 55.60 | 55.89 | 56.35 | 55.96 | 54.87 | 54.08 | 54.12 | 54.65 | 54.64 | 54.40 |
| TiO2 | 0.17 | 0.17 | 0.21 | 0.10 | 0.10 | 0.17 | 0.11 | 0.22 | 0.19 | 0.22 | 0.18 | 0.18 | 0.18 |
| Al2O3 | 5.93 | 7.23 | 5.82 | 5.97 | 5.83 | 5.88 | 6.06 | 6.43 | 6.41 | 6.58 | 6.52 | 6.39 | 6.36 |
| Cr2O3 | 0.43 | 0.48 | 0.44 | 0.37 | 0.55 | 0.43 | 0.35 | 0.42 | 0.45 | 0.40 | 0.28 | 0.34 | 0.31 |
| FeOt | 6.96 | 6.86 | 7.09 | 6.87 | 6.98 | 7.29 | 6.92 | 7.27 | 7.44 | 7.55 | 7.54 | 7.31 | 6.78 |
| MnO | 0.12 | 0.13 | 0.18 | 0.19 | 0.09 | 0.12 | 0.16 | 0.07 | 0.10 | 0.10 | 0.10 | 0.17 | 0.09 |
| MgO | 31.06 | 28.33 | 31.30 | 31.08 | 30.55 | 30.17 | 29.13 | 30.55 | 30.86 | 29.80 | 30.96 | 31.26 | 31.22 |
| NiO | 0.10 | 0.01 | 0.12 | 0.13 | 0.16 | 0.13 | 0.11 | 0.01 | 0.10 | 0.14 | 0.12 | 0.08 | 0.06 |
| CaO | 1.11 | 1.04 | 1.14 | 1.14 | 1.18 | 1.14 | 1.21 | 1.20 | 1.28 | 1.26 | 1.19 | 1.18 | 1.11 |
| Na2O | 0.15 | 0.47 | 0.17 | 0.14 | 0.14 | 0.16 | 0.17 | 0.17 | 0.11 | 0.13 | 0.15 | 0.11 | 0.17 |
| sum | 101.58 | 100.40 | 101.76 | 101.60 | 101.47 | 101.83 | 100.18 | 101.22 | 101.01 | 100.31 | 101.68 | 101.66 | 100.66 |
|  |  |  |  |  |  |  |  |  |  |  |  |  |  |
| Si (apfu) | 0.924 | 0.927 | 0.920 | 0.925 | 0.930 | 0.938 | 0.931 | 0.913 | 0.900 | 0.901 | 0.909 | 0.909 | 0.905 |
| Ti | 0.002 | 0.002 | 0.003 | 0.001 | 0.001 | 0.002 | 0.001 | 0.003 | 0.002 | 0.003 | 0.002 | 0.002 | 0.002 |
| Al | 0.116 | 0.142 | 0.114 | 0.117 | 0.114 | 0.115 | 0.119 | 0.126 | 0.126 | 0.129 | 0.128 | 0.125 | 0.125 |
| Cr | 0.006 | 0.006 | 0.006 | 0.005 | 0.007 | 0.006 | 0.005 | 0.005 | 0.006 | 0.005 | 0.004 | 0.004 | 0.004 |
| Fet | 0.097 | 0.095 | 0.099 | 0.096 | 0.097 | 0.101 | 0.096 | 0.101 | 0.104 | 0.105 | 0.105 | 0.102 | 0.094 |
| Mn | 0.002 | 0.002 | 0.002 | 0.003 | 0.001 | 0.002 | 0.002 | 0.001 | 0.001 | 0.001 | 0.001 | 0.002 | 0.001 |
| Mg | 0.770 | 0.703 | 0.776 | 0.771 | 0.758 | 0.748 | 0.723 | 0.758 | 0.765 | 0.739 | 0.768 | 0.775 | 0.774 |
| Ni | 0.001 | 0.000 | 0.002 | 0.002 | 0.002 | 0.002 | 0.001 | 0.000 | 0.001 | 0.002 | 0.002 | 0.001 | 0.001 |
| Ca | 0.020 | 0.019 | 0.020 | 0.020 | 0.021 | 0.020 | 0.022 | 0.021 | 0.023 | 0.022 | 0.021 | 0.021 | 0.020 |
| Na | 0.005 | 0.015 | 0.005 | 0.005 | 0.004 | 0.005 | 0.006 | 0.005 | 0.003 | 0.004 | 0.005 | 0.004 | 0.005 |
|  |  |  |  |  |  |  |  |  |  |  |  |  |  |
| Mg/Mg+Fet | 88.83 | 88.04 | 88.73 | 88.96 | 88.64 | 88.06 | 88.24 | 88.22 | 88.09 | 87.56 | 87.97 | 88.40 | 89.13 |
|  |  |  |  |  |  |  |  |  |  |  |  |  |  |
| En | 86.69 | 85.84 | 86.47 | 86.66 | 86.38 | 85.85 | 85.75 | 85.97 | 85.69 | 85.15 | 85.76 | 86.09 | 87.02 |
| Fs | 11.09 | 11.89 | 11.27 | 11.06 | 11.22 | 11.83 | 11.69 | 11.59 | 11.75 | 12.26 | 11.88 | 11.56 | 10.75 |
| Wo | 2.22 | 2.27 | 2.26 | 2.28 | 2.40 | 2.32 | 2.56 | 2.44 | 2.56 | 2.58 | 2.37 | 2.34 | 2.23 |

Table 3 (end)

| sample |  |  |  |  |  |  |  |  |  |  |  |  |  |  |  |  |
| --- | --- | --- | --- | --- | --- | --- | --- | --- | --- | --- | --- | --- | --- | --- | --- | --- |
| nb | 14 | 15 | 16 | 17 | 18 | 19 | 20 | 21 | 22 | 23 | 24 | 25 | 26 | 27 | 28 | 29 |
| SiO2 (wt. %) | 55.14 | 52.83 | 54.69 | 54.83 | 55.39 | 55.19 | 55.07 | 55.65 | 55.88 | 55.52 | 55.55 | 55.69 | 55.66 | 54.91 | 54.90 | 54.97 |
| TiO2 | 0.11 | 0.10 | 0.19 | 0.18 | 0.13 | 0.11 | 0.21 | 0.15 | 0.06 | 0.10 | 0.17 | 0.09 | 0.15 | 0.14 | 0.18 | 0.21 |
| Al2O3 | 5.97 | 8.95 | 5.88 | 5.84 | 5.78 | 5.53 | 5.80 | 5.63 | 5.71 | 5.62 | 5.83 | 5.79 | 5.81 | 6.06 | 6.10 | 6.37 |
| Cr2O3 | 0.33 | 0.34 | 0.37 | 0.37 | 0.36 | 0.36 | 0.29 | 0.35 | 0.37 | 0.31 | 0.26 | 0.31 | 0.35 | 0.32 | 0.38 | 0.35 |
| FeOt | 7.36 | 6.93 | 7.61 | 7.36 | 6.96 | 7.39 | 7.48 | 7.00 | 7.04 | 7.21 | 7.32 | 7.05 | 7.35 | 7.43 | 7.09 | 7.39 |
| MnO | 0.17 | 0.09 | 0.15 | 0.21 | 0.05 | 0.17 | 0.21 | 0.09 | 0.09 | 0.06 | 0.15 | 0.11 | 0.13 | 0.11 | 0.17 | 0.08 |
| MgO | 31.03 | 29.43 | 31.51 | 31.58 | 31.52 | 31.73 | 31.35 | 31.84 | 31.31 | 31.65 | 31.23 | 31.36 | 30.93 | 30.98 | 30.62 | 30.74 |
| NiO | 0.05 | 0.05 | 0.10 | 0.14 | 0.14 | 0.09 | 0.07 | 0.01 | 0.11 | 0.18 | 0.10 | 0.11 | -0.05 | 0.12 | 0.13 | 0.07 |
| CaO | 1.05 | 1.15 | 1.02 | 0.96 | 0.93 | 0.95 | 0.89 | 0.90 | 0.90 | 0.85 | 0.91 | 1.00 | 1.10 | 1.13 | 1.22 | 1.26 |
| Na2O | 0.14 | 0.16 | 0.14 | 0.16 | 0.12 | 0.16 | 0.12 | 0.16 | 0.15 | 0.11 | 0.13 | 0.15 | 0.15 | 0.13 | 0.14 | 0.17 |
| sum | 101.34 | 100.02 | 101.66 | 101.64 | 101.37 | 101.68 | 101.49 | 101.77 | 101.62 | 101.61 | 101.64 | 101.65 | 101.58 | 101.32 | 100.93 | 101.61 |
|  |  |  |  |  |  |  |  |  |  |  |  |  |  |  |  |  |
| Si (apfu) | 0.918 | 0.879 | 0.910 | 0.913 | 0.922 | 0.918 | 0.917 | 0.926 | 0.930 | 0.924 | 0.924 | 0.927 | 0.926 | 0.914 | 0.914 | 0.915 |
| Ti | 0.001 | 0.001 | 0.002 | 0.002 | 0.002 | 0.001 | 0.003 | 0.002 | 0.001 | 0.001 | 0.002 | 0.001 | 0.002 | 0.002 | 0.002 | 0.003 |
| Al | 0.117 | 0.176 | 0.115 | 0.115 | 0.113 | 0.108 | 0.114 | 0.110 | 0.112 | 0.110 | 0.114 | 0.114 | 0.114 | 0.119 | 0.120 | 0.125 |
| Cr | 0.004 | 0.004 | 0.005 | 0.005 | 0.005 | 0.005 | 0.004 | 0.005 | 0.005 | 0.004 | 0.003 | 0.004 | 0.005 | 0.004 | 0.005 | 0.005 |
| Fet | 0.102 | 0.096 | 0.106 | 0.102 | 0.097 | 0.103 | 0.104 | 0.097 | 0.098 | 0.100 | 0.102 | 0.098 | 0.102 | 0.103 | 0.099 | 0.103 |
| Mn | 0.002 | 0.001 | 0.002 | 0.003 | 0.001 | 0.002 | 0.003 | 0.001 | 0.001 | 0.001 | 0.002 | 0.002 | 0.002 | 0.001 | 0.002 | 0.001 |
| Mg | 0.770 | 0.730 | 0.782 | 0.783 | 0.782 | 0.787 | 0.778 | 0.790 | 0.776 | 0.785 | 0.775 | 0.778 | 0.767 | 0.768 | 0.759 | 0.762 |
| Ni | 0.001 | 0.001 | 0.001 | 0.002 | 0.002 | 0.001 | 0.001 | 0.000 | 0.001 | 0.002 | 0.001 | 0.001 | -0.001 | 0.002 | 0.002 | 0.001 |
| Ca | 0.019 | 0.021 | 0.018 | 0.017 | 0.017 | 0.017 | 0.016 | 0.016 | 0.016 | 0.015 | 0.016 | 0.018 | 0.020 | 0.020 | 0.022 | 0.023 |
| Na | 0.005 | 0.005 | 0.005 | 0.005 | 0.004 | 0.005 | 0.004 | 0.005 | 0.005 | 0.003 | 0.004 | 0.005 | 0.005 | 0.004 | 0.005 | 0.006 |
|  |  |  |  |  |  |  |  |  |  |  |  |  |  |  |  |  |
| Mg/Mg+Fet | 88.26 | 88.33 | 88.07 | 88.43 | 88.98 | 88.44 | 88.20 | 89.02 | 88.79 | 88.67 | 88.37 | 88.80 | 88.23 | 88.14 | 88.50 | 88.12 |
|  |  |  |  |  |  |  |  |  |  |  |  |  |  |  |  |  |
| En | 86.17 | 86.06 | 86.10 | 86.47 | 87.26 | 86.56 | 86.36 | 87.31 | 87.07 | 87.10 | 86.56 | 86.88 | 86.11 | 86.00 | 86.09 | 85.78 |
| Fs | 11.73 | 11.51 | 11.89 | 11.64 | 10.88 | 11.57 | 11.88 | 10.91 | 11.12 | 11.22 | 11.62 | 11.13 | 11.69 | 11.74 | 11.45 | 11.69 |
| Wo | 2.10 | 2.42 | 2.00 | 1.89 | 1.86 | 1.87 | 1.76 | 1.78 | 1.80 | 1.69 | 1.82 | 1.99 | 2.20 | 2.26 | 2.47 | 2.54 |
