# Supplementary material
Source: Research Square preprint supplement (doi:10.21203/rs.3.rs-9577321/v1)
Supplement: Supplementary file 4 [file c907c8cc17a73544f3e0e80e.docx]

| sample/method | TPCpx/Opx (°C) | PP(GPa) | TBKCpx/Opx (°C) | TWCpx/Opx°(C) | Depth (km) |
| --- | --- | --- | --- | --- | --- |
| FG2 | 1123 | 1.26 | 1119 | 1093 | 41.6 |
| FG2 | 1138 | 1.29 | 1132 | 1102 | 42.6 |
| FG2 | 1247 | 2.00 | 1124 | 1131 | 66.0 |
| FG2 | 1116 | 1.26 | 1121 | 1097 | 41.6 |
| FG2 | 1110 | 1.20 | 1125 | 1088 | 39.6 |
| FG2 | 1112 | 1.31 | 1136 | 1100 | 43.2 |
| FG2 | 1155 | 1.65 | 1138 | 1108 | 54.5 |
| FG2 | 1111 | 1.32 | 1120 | 1087 | 43.6 |
| FG2 | 1123 | 1.26 | 1115 | 1099 | 41.6 |
| FG2 | 1124 | 1.29 | 1123 | 1106 | 42.6 |
| FG2 | 1124 | 1.33 | 1123 | 1105 | 43.9 |
| FG3 | 1120 | 1.26 | 1139 | 1080 | 41.6 |
| FG3 | 1107 | 1.12 | 1132 | 1089 | 37.0 |
| FG3 | 1115 | 1.18 | 1137 | 1097 | 38.9 |
| FG3 | 1117 | 1.23 | 1151 | 1090 | 40.6 |
| FG3 | 1121 | 1.30 | 1154 | 1079 | 42.9 |
| FG3 | 1098 | 1.18 | 1145 | 1082 | 38.9 |

Table 6.
