# Supplementary material
Source: Research Square preprint supplement (doi:10.21203/rs.3.rs-9577321/v1)
Supplement: Supplementary file 5 [file d40ced41271c041f3a16bdcd.docx]

Table 5.

| sample | FG2 |  |  | FG3 |  |
| --- | --- | --- | --- | --- | --- |
| nb | 1 | 2 | 3 | 4 | 5 |
| SiO2 (wt. %) | 0.09 | 0.06 | 0.06 | 0.03 | 0.05 |
| TiO2 | 0.02 | 0.02 | 0.01 | 0.01 | 0.01 |
| Al2O3 | 55.50 | 55.32 | 55.35 | 55.12 | 54.84 |
| Cr2O3 | 10.27 | 11.06 | 10.47 | 10.61 | 10.96 |
| FeO | 10.25 | 9.62 | 10.38 | 10.04 | 10.07 |
| MgO | 20.97 | 21.37 | 21.30 | 21.18 | 21.24 |
| NiO | 0.32 | 0.35 | 0.27 | 0.35 | 0.43 |
| sum | 97.62 | 97.99 | 97.90 | 97.38 | 97.67 |
|  |  |  |  |  |  |
| Si (apfu) | 0.019 | 0.012 | 0.013 | 0.006 | 0.012 |
| Ti | 0.003 | 0.003 | 0.002 | 0.002 | 0.002 |
| Al | 13.802 | 13.701 | 13.702 | 13.719 | 13.631 |
| Cr | 1.713 | 1.837 | 1.738 | 1.771 | 1.827 |
| Fe3+ | 0.439 | 0.431 | 0.531 | 0.493 | 0.515 |
| Fe2+ | 1.370 | 1.261 | 1.293 | 1.280 | 1.260 |
| Mn | 0.000 | 0.000 | 0.000 | 0.000 | 0.000 |
| Mg | 6.598 | 6.696 | 6.671 | 6.669 | 6.678 |
| Ni | 0.055 | 0.059 | 0.046 | 0.059 | 0.073 |
|  |  |  |  |  |  |
| Mg/Mg+Fe | 82.80 | 84.15 | 83.76 | 83.90 | 84.12 |
| Cr/Al+Cr | 11.04 | 11.82 | 11.26 | 11.43 | 11.82 |
| Fe2+/Mg+Fe2+ | 17.20 | 15.85 | 16.24 | 16.10 | 15.88 |
| Fe3+/Cr+Al+Fe3+ | 2.75 | 2.70 | 3.32 | 3.09 | 3.22 |
