# Supplementary material
Source: Research Square preprint supplement (doi:10.21203/rs.3.rs-9577321/v1)
Supplement: Supplementary file 6 [file e12971ce69e834e1b6800f01.docx]

| sample | coordinates | olivine | orthopyroxene | clinopyroxene | spinel |
| --- | --- | --- | --- | --- | --- |
| FG1 | N07°34’37.37’’ E13°47’19.8’’ | 67 | 20 | 10 | 3 |
| FG2 | N07°34’37.4’’ E13°47’19.6’’ | 60 | 20 | 16 | 4 |
| FG3 | N07°34’37.4’’ E13°47’20.4’’ | 65 | 20 | 13 | 2 |
| FG4 | N07°34’37.3’’ E13°47’20.5’’ | 66 | 19 | 11 | 4 |
| FG5 | N07°34’36’’ E13°47’23.3’’ | 70 | 21 | 8 | 1 |
| FG6 | N07°34’35.9’’ E13°47’22.7’’ | 68 | 19 | 9 | 4 |
| FG7 | N07°34’35.7’’ E13°47’21.7’’ | 63 | 25 | 8 | 4 |
| FG8 | N07°34’36.1’’ E13°47’21.1’’ | 72 | 16 | 9 | 3 |
| FG9 | N07°34’37’4’’ E13°47’19.6’’ | 69 | 19 | 11 | 1 |
| FG10 | N07°34’36’’ E13°47’23.3’’ | 72 | 18 | 10 | 0 |

Table 1.
